# Supplementary material for: COVID-19 Vaccination in Multiple Sclerosis and Inflammatory Diseases: Effects from Disease-Modifying Therapy, Long-Term Seroprevalence and Breakthrough Infections
Source: MDPI journal article supplement (doi:10.3390/vaccines10050695), 2022-04-28
Supplement: s1 [file s1]

**Table S1.** Absolute IgG index between different DMTs and vaccines used.

| DMT – IgG index | BNT162b2             | mRNA-1273            | Ad26.COV2.S         | p-value          |
|-----------------|----------------------|----------------------|---------------------|------------------|
| No DMT          | n = 42<br>16.1 (6.7) | n = 42<br>16.4 (6.2) | n = 6<br>2.3 (1.4)  | <b>&lt;0.001</b> |
| IFN- $\beta$    | n = 32<br>15.7 (6.4) | n = 35<br>17.3 (5.1) | n = 6<br>6.7 (7.1)  | <b>&lt;0.001</b> |
| GA              | n = 25<br>15.6 (7.1) | n = 25<br>19.1 (3.0) | n = 2<br>2.7 (0.1)  | <b>&lt;0.001</b> |
| Fumarate        | n = 25<br>14.0 (7.9) | n = 19<br>17.9 (4.6) | -                   | <b>0.023</b>     |
| Teriflunomide   | n = 11<br>15.3 (7.1) | n = 9<br>14.3 (8.6)  | n = 1<br>1.0        | 0.146            |
| S1Ps            | n = 5<br>2.8 (2.1)   | n = 1<br>20.0        | -                   | 0.131            |
| Natalizumab     | n = 28<br>16.5 (6.2) | n = 20<br>17.5 (6.0) | n = 5<br>10.7 (8.6) | 0.179            |
| Cladribine      | n = 3<br>8.2 (10.3)  | n = 3<br>12.3 (6.6)  | -                   | 0.591            |
| Off-label DMT   | n = 8<br>13.7 (7.4)  | n = 7<br>13.0 (8.8)  | -                   | 0.675            |
| Anti-CD20 mAb   | n = 11<br>13.7 (8.7) | n = 18<br>9.4 (8.2)  | n = 1<br>1.2        | 0.298            |
| Alemtuzumab     | n = 4<br>20.0        | n = 1<br>3.3         | -                   | -                |

**Legend:** MS – multiple sclerosis, DMT – disease modifying therapy, IFN – interferon, S1Ps – sphingosine-1-phosphate, SD – standard deviation, mAb – monoclonal antibody. Statistically significant p-values are shown in bold.

Rituximab, ocrelizumab and ofatumumab were all grouped under the category of Anti-CD20 mAb. Fingolimod, ponesimod, siponimod and ozanimod were grouped under the S1P category. Both dimethyl fumarate and diroximel fumarate were grouped under Fumarates. Off-label MS medications included, cyclophosphamide, intravenous immunoglobulin, azathioprine, methotrexate and mycophenolic acid.

The maximal reported IgG index is at 20.0.

One-way analysis of variance (ANOVA) was used. P-values lower than 0.05 were considered statistically significant and shown in bold.

**Table S2.** Changes in absolute IgG index over 6 months after full vaccination course.

| Vaccine     | Timepoint | Median (IQR)      | Number of samples | p-value      |
|-------------|-----------|-------------------|-------------------|--------------|
| BNT162b2    | 4-weeks   | 20.0.1 (1.0-20.0) | 49                | <b>0.004</b> |
|             | 6-months  | 6.7 (0.0-9.9)     | 49                |              |
| mRNA-1273   | 4-weeks   | 20.0(20.0-20.0)   | 41                | <b>0.014</b> |
|             | 6-months  | 10.4 (3.4-20.0)   | 41                |              |
| Ad26.COV2.S | 4-weeks   | 1.6 (0.9-4.8)     | 10                | 0.161        |
|             | 6-months  | 0.0 (0.0-2.2)     | 10                |              |

**Legend:** IQR – interquartile range, P-values lower than 0.05 were considered statistically significant and shown in bold. The maximal reported IgG index is at 20.0. P-values lower than 0.05 were considered statistically significant and shown in bold.
